# Supplementary material
Source: PubMed Central journal article supplement (PMC5735415)
Supplement: NIHMS925219-supplement-Appendix_Table_S1.pdf [file NIHMS925219-supplement-Appendix_Table_S1.pdf]

Appendix Table 1. State MML Program Type and Change in Prevalence of Marijuana Before and After Passage

| State (N=23) | MML Program Type         | Year MML Passed | Period (# of years) <sup>a</sup> | Average Prevalence of Marijuana Use | Change |
|--------------|--------------------------|-----------------|----------------------------------|-------------------------------------|--------|
| CA           | Non-Medical              | 1996            | Before 0<br>After 10             | -<br>10.90                          | N/A    |
| OR           | Non-Medical              | 1998            | Before 0<br>After 10             | -<br>13.42                          | N/A    |
| WA           | Non-Medical              | 1998            | Before 0<br>After 10             | -<br>12.20                          | N/A    |
| AK           | Non-Medical              | 1998            | Before 0<br>After 10             | -<br>13.70                          | N/A    |
| ME           | Non-Medical              | 1999            | Before 0<br>After 10             | -<br>14.11                          | N/A    |
| CO           | Non-Medical              | 2000            | Before 0<br>After 10             | -<br>14.44                          | N/A    |
| NV           | Non-Medical              | 2000            | Before 0<br>After 10             | -<br>10.36                          | N/A    |
| HI           | Non-Medical              | 2000            | Before 0<br>After 10             | -<br>10.77                          | N/A    |
| MD           | Non-Medical <sup>b</sup> | 2003            | Before 0<br>After 10             | -<br>8.91                           | N/A    |
| MT           | Non-Medical              | 2004            | Before 0<br>After 10             | -<br>13.22                          | N/A    |
| VT           | Non-Medical              | 2004            | Before 1<br>After 9              | 14.37<br>16.96                      | 2.59   |
| RI           | Non-Medical              | 2006            | Before 2<br>After 8              | 14.86<br>16.73                      | 1.87   |
| NM           | Non-Medical              | 2007            | Before 4<br>After 6              | 11.10<br>11.73                      | 0.63   |
| MI           | Non-Medical              | 2008            | Before 5<br>After 5              | 10.27<br>12.29                      | 2.02   |
| NJ           | Medicalized              | 2010            | Before 7<br>After 3              | 8.56<br>8.97                        | 0.41   |
| AZ           | Non-Medical              | 2010            | Before 6<br>After 4              | 8.81<br>10.51                       | 1.70   |
| DE           | Medicalized              | 2011            | Before 8<br>After 2              | 10.82<br>11.54                      | 0.72   |
| CT           | Medicalized              | 2012            | Before 9<br>After 1              | 12.21<br>11.88                      | -0.33  |

|                  |                    |      |                      |                |              |
|------------------|--------------------|------|----------------------|----------------|--------------|
| MA               | Medicalized        | 2012 | Before 8<br>After 2  | 13.79<br>14.51 | 0.72         |
| IL               | Medicalized        | 2013 | Before 10<br>After 0 | 9.39<br>-      | N/A          |
| NH               | Medicalized        | 2013 | Before 10<br>After 0 | 14.38<br>-     | N/A          |
| MN               | Medicalized        | 2013 | Before 10<br>After 0 | 9.69<br>-      | N/A          |
| NY               | Medicalized        | 2014 | Before 10<br>After 0 | 11.51<br>-     | N/A          |
| <b>Aggregate</b> | <b>Non-Medical</b> |      |                      |                | <b>1.762</b> |
| <b>Aggregate</b> | <b>Medicalized</b> |      |                      |                | <b>0.38</b>  |

<sup>a</sup> = # of years is number of NSDUH data points available pre or post MML passage.

<sup>b</sup> = Maryland was coded non-medical through 2014 when MMLs were changed.

<sup>c</sup> = Aggregated results average over all 9 states which passed MML during 2004-2013 by taking simple average of before-passage use and simple averages of after-passage use.
